# Supplementary material for: Electron–phonon coupling mechanisms of broadband near-infrared emissions from Cr3+ in the Ca3Sc2Si3O12 garnet
Source: Royal Society of Chemistry journal article supplement (doi:10.1039/d0cp00240b), 2020-01-01
Supplement: d0cp00240b1.pdf [file d0cp00240b1.pdf]

## Supporting Information

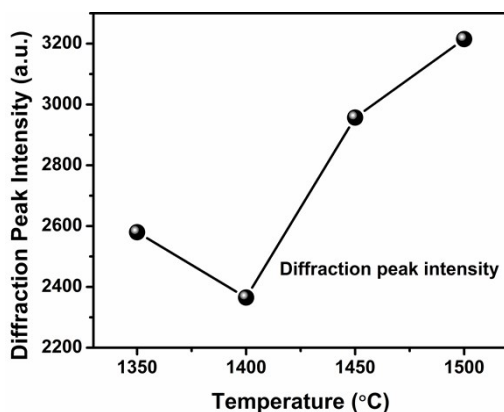

Fig. S1 Diffraction peak (at  $\sim 32.8^\circ$ ) intensities for CSSG:3%Cr<sup>3+</sup> calcined at 1350 -1500 °C.

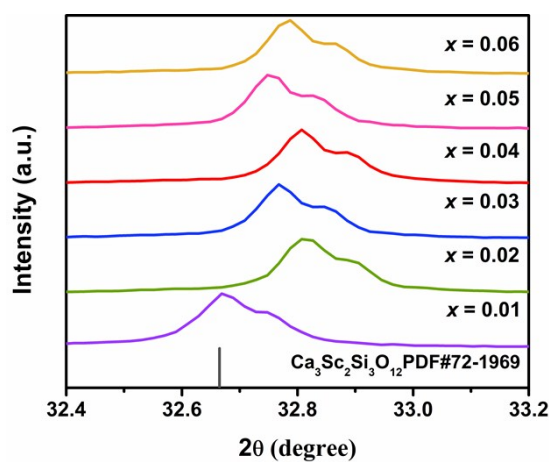

Fig. S2 Magnified XRD peaks for CSSG:xCr<sup>3+</sup> with different x values.

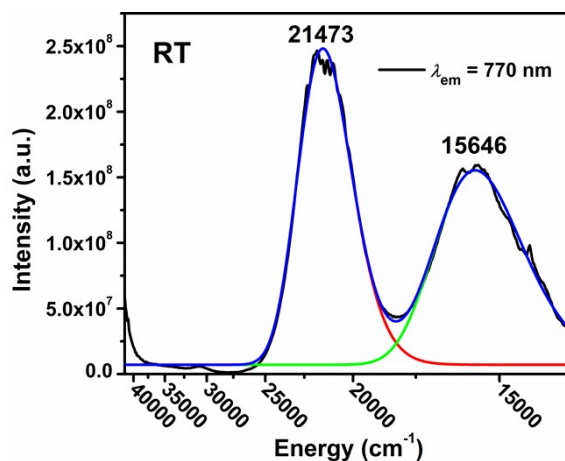

Fig. S3 PLE spectrum (black line) of  ${}^4T_1({}^4F)$  and  ${}^4T_2({}^4F)$  bands at room temperature fitted by a Gaussian function. Red line and green line are the Gaussian band for  ${}^4T_1({}^4F)$  and  ${}^4T_2({}^4F)$ , respectively. Blue line is total fitted spectrum.

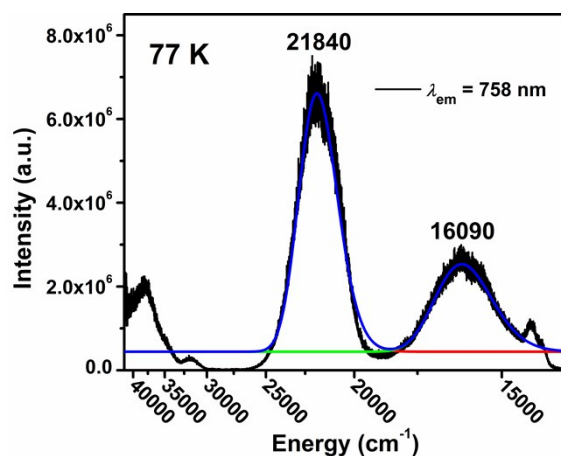

**Fig. S4** PLE spectrum (black line) of  ${}^4T_1({}^4F)$  and  ${}^4T_2({}^4F)$  bands at 77 K fitted by a Gaussian function. Red line and green line are the Gaussian band for  ${}^4T_1({}^4F)$  and  ${}^4T_2({}^4F)$ , respectively. Blue line is total fitted spectrum.

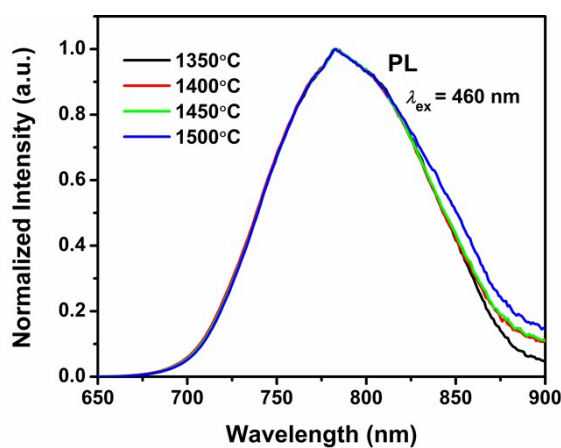

**Fig. S5** Normalized PL spectra of CSSG:3%Cr $^{3+}$  calcined at 1350 -1500 °C.

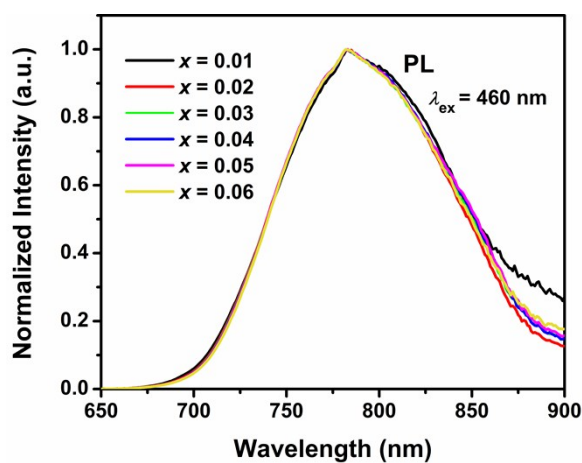

**Fig. S6** Normalized PL spectra of CSSG: $x$ Cr $^{3+}$  ( $x = 0.01 - 0.06$ ) sintering at 1500 °C.
